# A Meta-analysis of the known Global Distribution and Host Range of the *Ralstonia* Species Complex

Tiffany Lowe-Power\*, Jason Avalos, Yali Bai, Maria Charco Munoz, Kyle Chipman, Cloe E. Tom, and Darrielle Williams

University of California Davis

## Abstract

The *Ralstonia* species complex is a group of genetically diverse plant wilt pathogens. Our goal is to create a database that contains the reported global distribution and host range of *Ralstonia* clades (e.g. phylotypes and sequevars). In this fourth release, we have cataloged information from 197 sources that report one or more *Ralstonia* strains isolated from 105 geographic regions. Metadata for nearly 8,000 strains are available as a supplemental table. The aggregated data suggest that the pandemic brown rot lineage (IIB-1) is the most widely dispersed lineage, and the phylotype I and IIB-4 lineages have the broadest natural host range. Although Phylotype III is largely restricted to Africa, several studies report that these strains have been introduced into the Americas (the Caribbean and South America). Similarly, although Phylotype IV is mostly found in East and Southeast Asia, phylotype IV strains are reported to be present in Eastern Africa.

Additionally, we have created an open science resource for phylogenomics of the RSSC. We associated strain metadata (host of isolation, location of isolation, and clade) with over 250 genomes in a public KBase Narrative. Our colleagues can use this narrative to identify the phylogenetic position of newly sequenced strains.

\* Corresponding author: [tlowepower@ucdavis.edu](mailto:tlowepower@ucdavis.edu)

## Introduction

Bacterial pathogens in the *Ralstonia* species complex are xylem pathogens that infect a broad range of agricultural and natural plant hosts. *Ralstonia* strains clog plant xylem vessels, leading plant hosts to wilt [1]. Historically, *Ralstonia* strains were classified based on carbon utilization patterns (“Biovar”) and host range (“Race”). However, DNA sequence-based taxonomies more accurately reflect the evolutionary trajectories of *Ralstonia* lineages.

Currently, the *Ralstonia solanacearum* species complex (RSSC) is classified into three species: *R. solanacearum*, *R. pseudosolanacearum*, and *R. syzygii*. The separation of *Ralstonia* into three species was first proposed by Remenant *et al.* 2010 [2], formalized by Safni *et al.* 2014 [3], and reinforced by Prior *et al.* 2016 [4]. Strains are also classified into a phylotype system, which overlaps with the species boundaries. All *R. solanacearum* strains are within phylotype II, but phylotype II is divided into IIA, IIB, and IIC groups. *R. pseudosolanacearum* strains are either in phylotype I or phylotype III. *R. syzygii* strains are in phylotype IV. Strains are further sub-classified into sequence variants, or “sequevars”, based on the DNA sequence of the conserved *egl* endoglucanase gene (Fig 1). Because *Ralstonia* are known to be naturally competent, we hypothesized that horizontal gene transfer of *egl* could confound sequevar-based phylogenies. We recently use whole genome phylogenetic trees to interrogate the robustness of *egl*-based trees [5]. We found that *egl* trees work well for phylotype II, but *egl* trees are highly inaccurate for phylotype I. Although only a small number of phylotype III and IV genomes were analyzed, the longer branch lengths in phylotype III and IV suggests that sequevars/*egl*-based trees may provide effective estimation of these strains’ phylogenetic position. Since the phylotype-sequevar system was first developed and described by Prior and Fegan in 2005 [6], hundreds of papers have used this system to describe the genetic diversity of *Ralstonia* isolates around the world. However, there has not been any public database that aggregates this population genetics information.

The *Ralstonia* community typically states that *Ralstonia* strains infect over 250 plant species in over 50 botanical families. Is that an under-estimation? Our goal is to perform a meta-analysis that documents the known host range and global distribution of each sequevar in the *Ralstonia* species complex. We intend to update this preprint and the associated GitHub repository at regular intervals as we populate the database. In version 4 of the database (this update), we also establish a user-friendly KBase narrative[7] that allows users to place new *Ralstonia* genomes within the phylogenomic context of public genome sequences.

| Species                             | Phylotype     | Sequevar                                                                                          |
|-------------------------------------|---------------|---------------------------------------------------------------------------------------------------|
| <i>Ralstonia solanacearum</i>       | Phylotype IIA | 5, 6, 24, 28, 35, 36, 37, 38, 39, 40, 41, 50, 52, 53, <i>58</i>                                   |
|                                     | Phylotype IIB | 1, 2, 3, 4, 25, 26, 27, 28, 51, <i>54, 55, 56, 57</i>                                             |
|                                     | Phylotype IIC | 7                                                                                                 |
| <i>Ralstonia pseudosolanacearum</i> | Phylotype I   | 12, 13, 14, 15, 16, 17, 18, 30, 31, 32, 33, 34, 44, 45, 46, 47, 48, <i>54, 55, 56, 57, 70, 71</i> |
|                                     | Phylotype III | 19, 20, 21, 22, 23, 29, 42, 43, 48, 49, <i>58</i> , 59, 60                                        |
| <i>Ralstonia syzygii</i>            | Phylotype IV  | 8, 9, 10, 11                                                                                      |

**Fig 1.** Taxonomic classification of the *Ralstonia* species complex at the species, phylotype and sequevar levels. Sequevars highlighted in red or purple italics are assigned to strains in conflicting phylotypes. As a note, many of the phylotype I sequevars are polyphyletic (See Sharma *et al* 2022 for details [5]), so the *Ralstonia* community needs to identify a cost-effective alternative for describing diversity of these strains. The clonal lineage that cause Blood Disease of Banana (BDB) are nested within phyl. IV-10 with non BDB phyl. IV strains.

## Methods

### Article Selection Criteria and Search Strategy:

We prioritized articles that used the phylotype and/or phylotype-sequevar system to characterize strains. We identified these articles by using Google Scholar to find the papers and theses that cite “How complex is the *Ralstonia solanacearum* species complex?” by Fegan and Prior 2005 [6]. We did not include the Race or Biovar information in the database. Although host range is an important trait of strains, measuring multi-host virulence is labor and time-intensive, and has rarely been performed. Therefore “race” assignments are usually listed solely based off of the host-of-isolation, which does not accurately predict the strains’ host range. We also excluded biovar data because the carbon utilization patterns are not predictive of phylogeny or the most important phenotypes for *Ralstonia*.

To get a better estimate of the diversity of potential hosts for *Ralstonia*, we did a search of the literature using search terms like “weeds”, “host range”, and older names for the pathogen (*Pseudomonas solanacearum*, *Burkholderia solanacearum*).

**Table 2: List of Papers in this Study**

| Year Published | References     |
|----------------|----------------|
| 1971           | [8,9]          |
| 1976           | [10]           |
| 1978           | [11]           |
| 1980           | [12]           |
| 1984           | [13]           |
| 1986           | [14–24]        |
| 1993           | [25–37]        |
| 1995           | [38]           |
| 1998           | [39–48]        |
| 1999           | [49–51]        |
| 2001           | [52–55]        |
| 2003           | [56–58]        |
| 2004           | [59]           |
| 2006           | [60,61]        |
| 2007           | [62–71]        |
| 2008           | [72–76]        |
| 2009           | [77–84]        |
| 2010           | [85–90]        |
| 2011           | [91–99]        |
| 2012           | [100–103]      |
| 2013           | [104–113]      |
| 2014           | [3,35,114–124] |
| 2015           | [125–139]      |
| 2016           | [4,140–143]    |
| 2017           | [144–155]      |
| 2018           | [156–166]      |
| 2019           | [167–171]      |
| 2020           | [83,172–188]   |

2021 [189–193]

2022 [194–198]

## Converting strain metadata into a structured format for data science:

We focused on cataloging information that is relevant to the epidemiology of the *Ralstonia* strains: Phylogenetic position, host of isolation, and geographic location where isolated. Additionally, when listed, we include any NCBI accessions for the genome, *egl* marker genes, or other genes.

For **phylogeny**, we record the phylotype (I-IV), sub-phylotype (for phylotype II, this is the IIA, IIB, or IIC subdivision), and sequevar (1-71). Several sequevars have been subdivided based on phylogeny and/or ecologically important traits, so we created a “sub-sequevar” column to denote these. This includes multiple subdivisions of sequevar IIB-4 and IV-10 sequevar which includes the “*R. syzygii* subspecies *celebensis*” (causes Blood disease of banana) and a clade of the paraphyletic “*R. syzygii* subspecies *indonesiensis*”.

For **host**, we created several columns to annotate the host at multiple taxonomic scales (order to species). We attempted to systematize all common names and species to a unified label. For example, all potato isolates are listed as “*Solanum tuberosum* (Potato)”. The systematic structure will make it easier to use R, python Pandas, or Excel equations to summarize and visualize the contents of the database.

For **location**, we record the most precise location information available (e.g. city, province, or country). We also have columns that describe the location at the country (or territory if the land region is geographically separated from the governing body), subcontinent, and continent levels.

## Database:

The full dataset is available as a supplementary table on this preprint.

**Table 2: Summary of the database**

| Database          | Paper published | # Countries or Territories | # Host plants |                          |            |            |
|-------------------|-----------------|----------------------------|---------------|--------------------------|------------|------------|
| Release Date      | # Papers        | range                      | # Strains     | # Sequevars <sup>b</sup> |            |            |
| 2020/07/03        | 35              | 2017-2020                  | 1625          | 57                       | 50         | 56         |
| 2021/03/23        | 73              | 2012-2020                  | 3395          | over 64 <sup>a</sup>     | 86         | 124        |
| 2021/11/03        | 93              | 2007-2020                  | 4924          | Over 71                  | 86         | 139        |
| <b>2022/08/30</b> | <b>197</b>      | <b>1971-2022</b>           | <b>7794</b>   | <b>68<sup>b</sup></b>    | <b>105</b> | <b>392</b> |

<sup>a</sup>As of this release, we have not investigated the sequevar assignment of strains classified into “unknown” or “new” sequevars.

<sup>b</sup>Note that sequevar is an imperfect phylogenetic system. See Sharma et al. 2022 for details [189]

## Extracting metadata for genomes available on NCBI.

Genomes on NCBI do not always have a corresponding Genome Announcement or other publication, but most of these genomes are deposited with ecological metadata on the corresponding “BioSample” page. The NCBI taxonomy is disorganized because of taxonomic revisions in this group. Many genomes for “*Ralstonia pseudosolanacearum*” (taxonomy ID: 1310165) and “*Ralstonia syzygii*” (taxonomy ID: 28097) were deposited as the “*Ralstonia solanacearum*” (taxonomy ID: 305), primarily because they were deposited prior to the renaming in 2014. Moreover, several genomes of the blood disease pathogen (*Ralstonia syzygii* subsp. *celebensis*) were deposited with their own taxonomy ID due to a peculiar taxonomic rule: these strains could not be formally named because the type strain was not viable in culture collections.

In July 2022, we extracted metadata for all RSSC genomes that we could identify in relevant “taxonomy IDs”. For each genome, we listed the “RefSeq Assembly Accession” when possible (GCF\_XXX). Some assemblies have been excluded from RefSeq due to problems like “too many frameshifted

proteins” or “highly fragmented genome”. In this case, we list the GenBank Assembly Accession (GCA\_xxx).

### Importing genomes into the “RSSC Phylogenomics” narrative on KBase .

KBase is a user-friendly graphical user interface for biological informatics that is developed and maintained with significant investment from the US Department of Energy [194]. Because RSSC genomes are dispersed across several (often inaccurate) taxid pages, we developed a KBase Narrative that can help us and other scientists identify the phylogenetic identity of new RSSC genomes.

We used the structured data on our spreadsheet to assign a systematic name to each genome, such as: “IIB-4D\_UW128\_Plantain-Musaceae\_SouthAmerica.genome”. The systematic name lists:

1. Phylogenetic information (phylotype, sequevar, subsequevar)
2. Strain name (spaces and parentheses removed. Colons, underscores, and hyphens were often removed)
3. Host of isolation (common name and family)
4. Location (subcontinent)

Initially, there were genomes that lacked precise phylogenetic information. To identify the phylogenetic identity of these genomes, we used the KBase App “Batch Create GenomeSet v1.2.0” to create a GenomeSet object that included all genomes ending in “.genome”. Then we used the “Insert Set of Genomes into SpeciesTree v2.2.0” to create a low-resolution phylogenetic tree. This app uses FastTree2 [199] with the -fastest setting to construct a tree based on an MSA of 49 core, universal bacterial genes. We inspected the tree, and we were able to assign many genomes to phylotypes and sequevars.

## Results and Discussion

We compiled 7,794 strains from almost 200 sources. These strains represent over 68 sequevars isolated from 105 countries or territories (Table 2). Most of the reported strains are phylotype I or II strains (Fig. 2). The full dataset is included as Table S1, which should be accessible on this pre-print. For each strain, we recorded taxonomy (phylotype and sequevar), host (specific name and the host plant’s taxonomic Family and Order), isolation year, isolation location, NCBI accessions (genome or partial sequences of *egl*, *mutS* and/or *rpIB* market genes) and the citation.

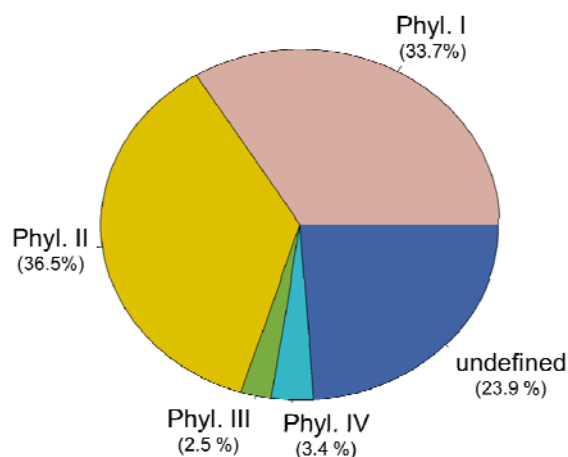

**Fig 2.** Phylotype assignments for strains in the Global Ralstonia Diversity database

We analyzed some of the host range and biogeographic distributions of the RSSC and phylotypes. You can find the full details in Table S1.

### Host Range:

Tables 3-5 summarize information about host range in the RSSC and the phylotypes. Table 6 attempts to look at host range within more narrow clades.

**Table 3:** The number of unique plant hosts (reported at various taxonomic levels)

|           | Species | Genera | Family | Order |
|-----------|---------|--------|--------|-------|
| All RSSC  | 392     | 246    | 78     | 35    |
| Phyl. I   | 95      | 79     | 46     | 28    |
| Phyl. II  | 63      | 45     | 33     | 25    |
| Phyl. III | 16      | 8      | 7      | 7     |
| Phyl. IV  | 7       | 5      | 3      | 3     |

**Table 4:** The top 21 most common host species to be listed in the database, sorted by frequency

| Host Species                | Frequency Reported | % of the total hosts reported |
|-----------------------------|--------------------|-------------------------------|
| Solanum tuberosum           | 2295               | 32.0%                         |
| Solanum lycopersicum        | 1532               | 21.4%                         |
| Solanum melongena           | 448                | 6.2%                          |
| Capsicum annuum             | 437                | 6.1%                          |
| Musa acuminata              | 373                | 5.2%                          |
| Nicotiana tabacum           | 339                | 4.7%                          |
| Zingiber officinale         | 181                | 2.5%                          |
| Eucalyptus pellita          | 118                | 1.6%                          |
| Arachis hypogaea            | 92                 | 1.3%                          |
| Solanum macrocarpon         | 84                 | 1.2%                          |
| Musa paradisiaca            | 76                 | 1.1%                          |
| Solanum dulcamara           | 54                 | 0.8%                          |
| Epipremnum aureum           | 52                 | 0.7%                          |
| Anthurium andraenum         | 40                 | 0.6%                          |
| Syzygium aromaticum         | 39                 | 0.5%                          |
| Cucurbita maxima            | 28                 | 0.4%                          |
| Solanum nigrum              | 27                 | 0.4%                          |
| Casuarina equisetifolia     | 26                 | 0.4%                          |
| Vaccinium sect. Cyanococcus | 24                 | 0.3%                          |
| Morus alba                  | 24                 | 0.3%                          |
| Ipomoea batatas             | 22                 | 0.3%                          |

**Table 5:** Heatmap that attempts to answer the question: “If I have a wilted [plant species], what phylotype is most likely the culprit?”

| Host Species (Common name)                     | I   | II   | III | IV  |
|------------------------------------------------|-----|------|-----|-----|
| Solanum tuberosum (Potato)                     | 358 | 1390 | 91  | 147 |
| Solanum lycopersicum (Tomato)                  | 695 | 432  | 48  | 25  |
| Solanum melongena (Eggplant)                   | 323 | 26   | 7   | 0   |
| Capsicum annuum (Pepper)                       | 300 | 21   | 4   | 2   |
| Musa acuminata (Banana)                        | 3   | 217  | 0   | 53  |
| Nicotiana tabacum (Tobacco)                    | 240 | 33   | 5   | 1   |
| Zingiber officinale (Ginger)                   | 134 | 5    | 0   | 0   |
| Eucalyptus pellita (Eucalyptus)                | 43  | 74   | 0   | 0   |
| Arachis hypogaea (Peanut)                      | 54  | 4    | 0   | 0   |
| Solanum macrocarpon (Gboma/African eggplant)   | 77  | 0    | 6   | 0   |
| Musa paradisiaca (Plantain)                    | 0   | 67   | 0   | 0   |
| Solanum dulcamara (Bittersweet nightshade)     | 0   | 52   | 0   | 0   |
| Epipremnum aureum (Pothos)                     | 0   | 17   | 0   | 0   |
| Pelargonium sp. (Geranium)                     | 10  | 20   | 9   | 0   |
| Anthurium sp.                                  | 3   | 45   | 0   | 0   |
| Anthurium andraenum (Flamingo flower/laceleaf) | 5   | 35   | 0   | 0   |
| Syzygium aromaticum (Clove)                    | 1   | 2    | 0   | 33  |
| Cucurbita maxima                               | 26  | 0    | 0   | 0   |
| Pelargonium sp. (Geranium)                     | 10  | 20   | 9   | 0   |
| Casuarina equisetifolia (Ironwood tree)        | 10  | 3    | 0   | 0   |
| Vaccinium sect. Cyanococcus (Blueberry)        | 1   | 3    | 0   | 0   |
| Morus alba (Mulberry)                          | 19  | 0    | 0   | 0   |
| Ipomoea batatas (Sweet Potato)                 | 15  | 1    | 0   | 0   |

We investigated which clades of *Ralstonia* have been isolated from the most plant species. In previous versions of the database, we considered individual sequevars to be equally diverse clades. After working more extensively with RSSC diversity, we have realized that phylotype I is about as diverse as some phyl II, III, and IV sequevars (at the ANI level). Therefore, we analyzed the host range of all phylotype I strains collectively. Results are in Table 6.

As a significant caveat, *Ralstonia* host range can vary between strains that are closely related (i.e. in the same sequevar) [64,190,195,200]. Nevertheless, host range patterns often correlate with phylogeny [195,200]. Collectively, Phylotype I has a wide host range (123 plant species in 43 botanical families). Phylotype IIB-4 has the next broadest host range (48 species in 21 botanical families). Phylotype IIB-1 has been isolated from 20 plant species in 7 botanical families. However, IIB-1 is also the most widely dispersed lineage, so it has appeared in more population survey studies than other lineages. The IIB-1 lineage is most commonly isolated from Solanaceae and Geranium family plants.

**Table 6:** RSSC clades whose members have been isolated off of the most diverse plants. (Note, this was determined using the “Host species (Common Name)” column while Table 3 was determined using the “Host species” column, which lacks any plants that were only identified to the genus level.

| Clade        | plant species |
|--------------|---------------|
| phyl. I      | 123           |
| phyl. IIB-4  | 48            |
| phyl. IIB-1  | 20            |
| phyl. III-48 | 11            |
| phyl. IIB-3  | 9             |

## Biogeography

*Ralstonia* strains have been isolated from over 100 countries (Fig. 3). Tables 7-8 summarize information about biogeography of the RSSC and the phylotypes. Table 9 attempts to look at distribution of more narrow clades.

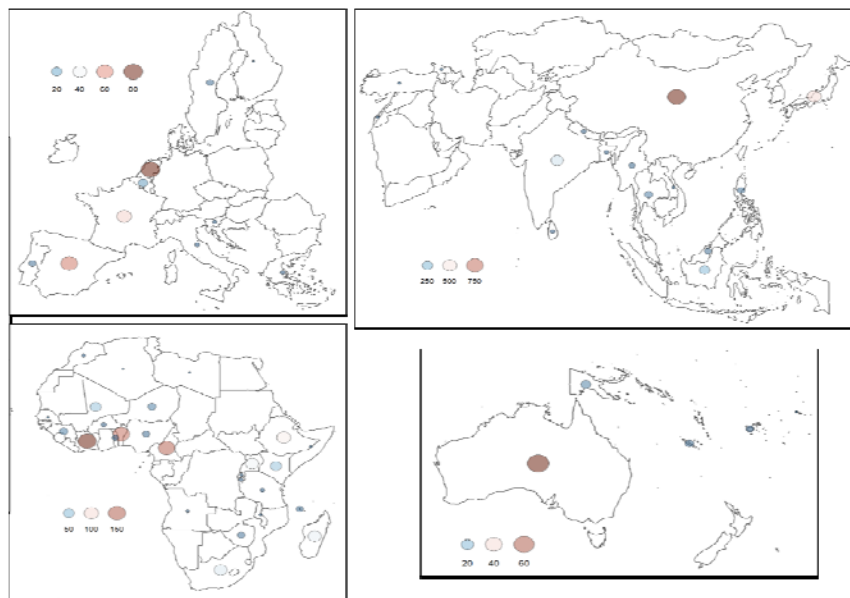

**Fig. 3.** Locations of strains included in the Global *Ralstonia* Database. Proportional circles in each country reflect the number of strains reported in the Global *Ralstonia* database, relative to other countries in the same continental group. The next update of the Global *Ralstonia* database will normalize the size of the circles across all countries and will show the abundance of *Ralstonia* in the Americas.

**Table 7:** Relative distribution of the RSSC and each phylotype, based on the number of unique countries where the strain has been isolated

|     |           | Unique Countries |
|-----|-----------|------------------|
|     | All RSSC  | 105              |
| I   | Phyl. I   | 51               |
| II  | Phyl. II  | 76               |
| III | Phyl. III | 19               |
| IV  | Phyl. IV  | 11               |

**Table 8:** Distribution of each phylotype level on different subcontinents. Red boxes indicate distributions that were unexpected.

|                           | I | II | III | IV |
|---------------------------|---|----|-----|----|
| Northern America          |   | x  |     |    |
| Central America           | x | x  |     |    |
| Southern America          | x | x  | x   |    |
| Caribbean                 | x | x  | x   |    |
| Western Europe            | x | x  |     |    |
| Southern Europe           |   | x  |     |    |
| Northern Africa           | x | x  |     |    |
| Western Africa            | x | x  | x   |    |
| Middle Africa             | x | x  | x   |    |
| Eastern Africa            | x | x  | x   | x  |
| Southern Africa           | x | x  |     |    |
| Western Asia              |   | x  |     |    |
| Southern Asia             | x | x  |     | x  |
| Eastern Asia              | x | x  |     | x  |
| South-Eastern Asia        | x | x  |     | x  |
| Micronesia                |   |    |     |    |
| Melanesia                 | x |    |     |    |
| Australia and New Zealand | x | x  |     | x  |
| Polynesia                 | x | x  |     |    |

## Pandemic Clades

We investigated which clades of *Ralstonia* have been isolated from the most countries. In previous versions of the database, we considered individual sequevars to be equally diverse clades. After working more extensively with RSSC diversity, we have realized that phylotype I is about as diverse as some phyl II, III, and IV sequevars (at the ANI level). Therefore, we analyzed the distribution of all phylotype I strains collectively. Results are in Table 9 and Table S1. Although phylotype I has a wide distribution (51 countries), the pandemic brown rot lineage (IIB-1) has been reported in more countries (58 countries). The next most widely dispersed clades are IIB-4, IIC-7, IIA-6, IIA-35, and IIB-3. Many of the widely dispersed clades are known to cause epidemics on crops (potato, banana, ginger) or ornamentals that are propagated vegetatively.

**Table 9:** Distribution of clades of *Ralstonia*



| Clade        | # countries |
|--------------|-------------|
| phyl. IIB-1  | 58          |
| phyl. I      | 51          |
| phyl. IIB-4  | 14          |
| phyl. IIC-7  | 10          |
| phyl. IIA-6  | 9           |
| phyl. IIA-35 | 8           |
| phyl. IIB-3  | 8           |
| phyl. III-48 | 6           |
| phyl. IIA-38 | 5           |
| phyl. IIA-39 | 4           |
| phyl. IIA-41 | 4           |

## RSSC Phylogenomics narrative on KBase

We created two open KBase narratives that have 275 or 340 decent-to-high quality genomes labeled with a structured name that indicates their phylogenetic identity, strain name, host of isolation, subcontinent of isolation, and an NCBI accession number:

- Narrative 1 has the maximum diversity of available *Ralstonia* genomes (n=275), but only has 5 of the clonal IIB-1 genomes (a pandemic lineage). This narrative has some suggestions for how to navigate KBase <https://narrative.KBase.us/narrative/123807>
- Narrative 2 has all genomes with a RefSeq quality assembly available (n=340). <https://narrative.KBase.us/narrative/124825>. Figure 4 shows the 340 strain tree.

Anyone can create a copy of these narratives, upload their own assembly to KBase, annotate the genes, and re-build the 49 gene phylogenetic tree to identify the position of new genomes. We will continue to update the narrative as we add genomes, so our colleagues should create a copy of the latest version of the narrative to assess new genomes. Narrative 1 is better suited for this purpose—removing 65 clonal genomes will allow the KBase applications to run faster.

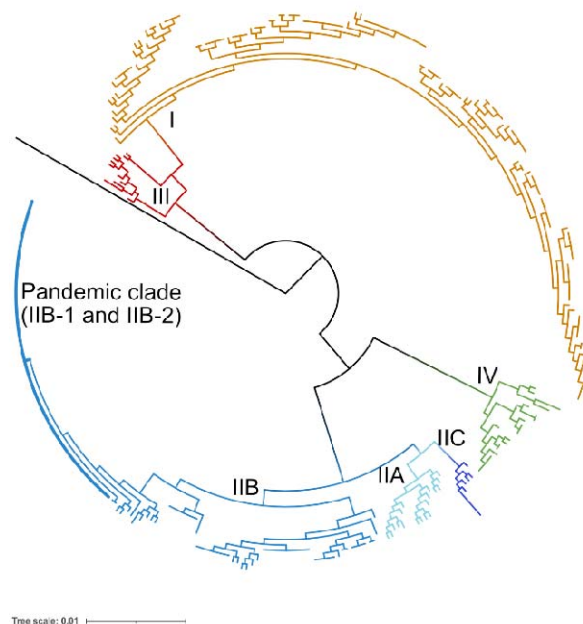

**Fig 4. A phylogenetic tree of 340 RSSC strains.** The outgroup is an *R. mannitolytica* genome. To create the stylized tree, the Newick format tree was downloaded from Narrative 2, stylized in iTol [201], and annotated in Affinity Designer. A high resolution version (PDF, PNG, or Newick format) can be downloaded from the KBase narrative.

We used the tree to curate the phylogenetic assignments of strains:

- One genome clustered in an unexpected position in the tree. Strain CRMRS218 was labeled a phylotype I strain in the original genome announcement [144], however, it clearly clusters with IIA strains. A search of Google Scholar indicates that many prior studies have drawn the same conclusion. We re-labeled this genome as a IIA strain.
- There was one strain (CIP120) that was called a “IIA-38” or a “IIA-50” sequevar strain in different references, but the whole-genome tree revealed that this strain is not closely related with three other IIA-38 strains (P597, RS489, and P816). So we assigned this strain to IIA-50.
- We assigned 21 genomes to phylotype I: B17\_UW800, FJ1003, FJAT1303.F1, FJAT1452.F1, FJAT-1458, FJAT1463.F1, FJAT15244.F1, FJAT15252.F1, FJAT15304.F1, FJAT15340.F1, FJAT15353.F1, FJAT442.F1, FJAT445.F1, FJAT448.F1, FJAT454.F1, FJAT-91, KACC10709, MAFF241647, MAFF241648, MAFF311693, and P380. These genomes had all been deposited to the *R. pseudosolanacearum* taxid, which can correspond to phyl I or III strains.
- We assigned 1 genome to phylotype III: LMG9673. This genome had been deposited to the *R. pseudosolanacearum* taxid, which can correspond to phyl I or III strains.
- We assigned 1 genome to phylotype IIA: RS489. RS489 is closely related to the IIA-38 genomes P597 and P816, so we assigned it to sequevar 38.
- We assigned 3 genomes to phylotype IIB: NCPPB3985, RS488, RsT01. Of these, RsT01 is closely related to the IIB-4 genomes in the C/E subclades, so we assigned it to IIB-4 (C or E).
- We assigned 1 genome to phylotype IV (*R. syzygii* subsp. *syzygii*): LMG10661.
- We assigned 2 genomes to phylotype IV (*R. syzygii* subsp. *indonesiensis*): KACC10722, T12.

## Assessing quality of genomes for downstream analyses

Not all genome assemblies are equal. Assemblies can suffer from many flaws. We did not import genomes that NCBI flagged as “many frameshifted proteins” (often due to being a Nanopore-only assembly), “fragmented assembly” (4700+ contigs, which suggests that the user uploaded only the coding sequences instead of the actual assembly)

For the assemblies imported into the KBase narrative, we used CheckM to assess their quality. CheckM yields estimates of the genomes’ completeness (are all of the expected genes present in the genome assembly?) and contamination (are there multiple homologs of genes that should be present in a single copy, suggesting that an unrelated genome has contaminated the assembly?). For completeness, we set a cut-off of requiring genomes to have no more than 4 missing “single copy genes”. This generally corresponds to a 99% complete cut-off. For contamination, we set a cut-off of 1%.

CheckM ran an error when processing eight genomes, so these could not be assessed. Based on the cut-offs, we classified 39 genomes as low-quality (24 genomes for low completeness and 15 genomes for high contamination). All of the draft genomes from Ailloud et al. 2015 have low completeness, likely because they were assembled from very short Illumina reads (2×150-nt paired). These genomes are estimated at 96-98% complete, which means the assemblies could be missing upwards of 200 genes. Two additional genomes have very low completeness: phyl. IIA-38 genome P816 was 81% complete and phyl. I genome VT0801 is 91% complete. After filtering for quality, there are only four phylotype IIA high quality genomes available, making this the least represented major branch of *Ralstonia* diversity.

## Conclusion

Bacterial wilt pathogens in the *Ralstonia* species complex are high impact global pathogens. We created a strain database that we will regularly update to document the distribution and host range of *Ralstonia*.

## Acknowledgements

We thank all of our colleagues who have carried out diversity surveys for *Ralstonia*. We thank Darrell Sparks for his contributions to the database.

## References

1. Ingel B, Caldwell D, Duong F, Parkinson DY, McCulloh KA, Iyer-Pascuzzi AS, et al. Revisiting the source of wilt symptoms: X-ray microcomputed tomography provides direct evidence that *Ralstonia* biomass clogs xylem vessels. *BioRxiv*. 2021. p. 2021.03.19.436187. doi:10.1101/2021.03.19.436187
2. Remenant B, Coupat-Goutaland B, Guidot A, Cellier G, Wicker E, Allen C, et al. Genomes of three tomato pathogens within the *Ralstonia solanacearum* species complex reveal significant evolutionary divergence. *BMC Genomics*. 2010;11: 379. doi:10.1186/1471-2164-11-379
3. Safni I, Cleenwerck I, De Vos P, Fegan M, Sly L, Kappler U. Polyphasic taxonomic revision of the *Ralstonia solanacearum* species complex: proposal to emend the descriptions of *R. solanacearum* and *R. syzygii* and reclassify current *R. syzygii* strains. *Int J Syst Evol Microbiol*. 2014;2014;64: 3087–103. doi:10.
4. Prior P, Ailloud F, Dalsing BL, Remenant B, Sanchez B, Allen C. Genomic and proteomic evidence supporting the division of the plant pathogen *Ralstonia solanacearum* into three species. *BMC Genomics*. 2016;17: 90. doi:10.1186/s12864-016-2413-z
5. Sharma P, Johnson MA, Mazloom R, Allen C, Heath LS, Lowe-Power TM, et al. Meta-analysis of the *Ralstonia solanacearum* species complex (RSSC) based on comparative evolutionary genomics and reverse ecology. *Microb Genom*. 2022;8. doi:10.1099/mgen.0.000791
6. Fegan M, Prior P. How complex is the *Ralstonia solanacearum* species complex. *Bacterial wilt disease and the *Ralstonia solanacearum* species complex*. APS press St. Paul; 2005. pp. 449–461. Available: [https://www.researchgate.net/profile/Philippe\\_Prior/publication/37628297\\_How\\_Complex\\_is\\_the\\_Ralstonia\\_Solanacearum\\_Species\\_Complex/links/541047830cf2f2b29a4079bb.pdf](https://www.researchgate.net/profile/Philippe_Prior/publication/37628297_How_Complex_is_the_Ralstonia_Solanacearum_Species_Complex/links/541047830cf2f2b29a4079bb.pdf)
7. Arkin AP, Cottingham RW, Henry CS, Harris NL, Stevens RL, Maslov S, et al. KBase : The United States Department of Energy Systems Biology Knowledgebase. *Nat Biotechnol*. 2018;36: 566–569. doi:10.1038/nbt.4163
8. Berg LA. Weed hosts of the SFR strain of *Pseudomonas solanacearum*, causal organism of bacterial wilt of bananas. *Phytopathology*. 1971. Available: <https://agris.fao.org/agris-search/search.do?recordID=US201302239782>
9. Pegg KG, Moffett ML. Host range of the ginger strain of *Pseudomonas solanacearum* in Queensland. *Aust J Exp Agric*. 1971;11: 696–698. doi:10.1071/ea9710696
10. Power. Moko, a new bacterial disease on banana and plantain in Surinam. *Surinaamse landbouw*. 1976. Available: <https://agris.fao.org/agris-search/search.do?recordID=US201302522553>

11. Graham J, Lloyd AB, Others. *Solanum cinereum*, a wild host of *Pseudomonas solanacearum* biotype II. Journal of the Australian Institute of Agricultural Science. 1978;44: 124–126. Available: <https://www.cabdirect.org/cabdirect/abstract/19791354146>
12. Kishun, Sohi, Rao. Two new collateral hosts for *Pseudomonas solanacearum*. Curr Sci. 1980. Available: <https://www.cabdirect.org/cabdirect/abstract/19801370089>
13. Velupillai, Stall. Variation among strains of *Pseudomonas solanacearum* from Florida. Proceedings of the Florida State. 1984. Available: <https://journals.flvc.org/fshs/article/download/95368/91383>
14. Hayward, AC. Bacterial wilt caused by *Pseudomonas solanacearum* in Asia and Australia: an overview. Bacterial Wilt Disease in Asia and the South Pacific. 1986.
15. Iqbal, M, Kunmar, J. Bacterial wilt in Fiji. Bacterial Wilt Disease in Asia and the South Pacific. 1986.
16. Sinha, SK. Bacterial wilt in India. Bacterial Wilt Disease in Asia and the South Pacific. 1986.
17. Machmud, M. Bacterial wilt in Indonesia. Bacterial Wilt Disease in Asia and the South Pacific. 1986.
18. Tomlinson, DL, Gunther, MT. Bacterial wilt in Papua New Guinea. Bacterial Wilt Disease in Asia and the South Pacific. 1986.
19. He LY. Bacterial wilt in the People’s Republic of China. Bacterial Wilt Disease in Asia and the South Pacific. 1986.
20. Valdez RB. Bacterial wilt in the Philippines. Bacterial Wilt Disease in Asia and the South Pacific. 1986.
21. Velupillai M. Bacterial wilt in Sri Lanka. Bacterial Wilt Disease in Asia and the South Pacific. 1986.
22. Titatarn V. Bacterial wilt in Thailand. Bacterial Wilt Disease in Asia and the South Pacific. 1986.
23. Tung PH. Bacterial wilt in Vietnam. Bacterial Wilt Disease in Asia and the South Pacific. 1986.
24. Buddenhagen. Bacterial wilt revisited. Bacterial wilt disease in Asia and the. 1985. Available: <https://ageconsearch.umn.edu/record/134643/files/PR013.pdf#page=124>
25. Li X, Dorsch T, Del Dot T, Sly LI, Stackebrandt E, Hayward AC. Phylogeny of Biovars of *Pseudomonas solanacearum* Based on Sequencing of 16S rRNA. Bacterial Wilt (Proceedings from an International Conference held in Taiwan). 1993.
26. Alvarez AM, Berestecky J, Stiles JJ, Ferreira SA, Benedict AA. Serological and Molecular Approaches to Identification of *Pseudomonas solanacearum* Strains from *Heliconia*. Bacterial Wilt (Proceedings from an International Conference held in Taiwan). 1993.
27. Marin JE, El-Nashaar HM. Pathogenicity of the New Phenotypes of *Pseudomonas solanacearum* from Peru. Bacterial Wilt (Proceedings from an International Conference held in Taiwan). 1993.
28. Adhikori TB, Manandhar JB, Hartman GL. Characterisation of *Pseudomonas solanacearum* and Evaluation of Tomatoes in Nepal. Bacterial Wilt (Proceedings from an International Conference held in Taiwan). 1993.
29. Hong NX, Mehan VK. Research on Bacterial Wilt of Groundnut in Vietnam. Bacterial Wilt (Proceedings from an International Conference held in Taiwan). 1993.

30. Hamidah S, Lum K. Bacterial Wilt of Groundnuts in Malaysia. Bacterial Wilt (Proceedings from an International Conference held in Taiwan). 1993.
31. Abdullah H. Bacterial Wilt in Malaysia: Hosts, Disease Incidence and Geographical Distribution. Bacterial Wilt (Proceedings from an International Conference held in Taiwan). 1993.
32. Wall GC, Sanchez JL. A Biocontrol Agent for *Pseudomonas solanacearum*. Bacterial Wilt (Proceedings from an International Conference held in Taiwan). 1993.
33. Fucikovsky LZ, Santos MO. Advance of Bacterial Wilt in Bananas in Mexico. Bacterial Wilt (Proceedings from an International Conference held in Taiwan). 1993.
34. Girard JC, Nicole JF, Chiron JJ, Gaubiac AM, Huvier O, Oudard B, et al. Bacterial Wilt Due to *Pseudomonas solanacearum* in Reunion: General Situation and Current Research. Bacterial Wilt (Proceedings from an International Conference held in Taiwan). 1993.
35. Ramesh R, Achari GA, Gaitonde S. Genetic diversity of *Ralstonia solanacearum* infecting solanaceous vegetables from India reveals the existence of unknown or newer sequevars of Phylotype I strains. Eur J Plant Pathol. 2014;140: 543–562. doi:10.1007/s10658-014-0487-5
36. Sood AK, Singh BM. Prevalence of Bacterial Wilt of Solanaceous Vegetables in the Mid-Hill Subhumid Zone of Himachal Pradesh, India. Bacterial Wilt (Proceedings from an International Conference held in Taiwan). 1993.
37. Feng J, Zhang M, Bai X, Han B, Liu T, Fan M, et al. One Specific DNA Piece in *Pseudomonas solanacearum* Affecting *Arachis hypogaea*. Bacterial Wilt (Proceedings from an International Conference held in Taiwan). 1993.
38. Smith JJ, Offord LC, Holderness M, Saddler GS. Genetic diversity of *Burkholderia solanacearum* (synonym *Pseudomonas solanacearum*) race 3 in Kenya. Appl Environ Microbiol. 1995;61: 4263–4268. doi:10.1128/aem.61.12.4263-4268.1995
39. Busolo-Bulaju CM. Resistance to Bacterial Wilt in Uganda. Bacterial Wilt Disease, Molecular and Ecological Aspects. 1998. pp. 306–308.
40. Fegan M, Taghavi M, Sly LI, Hayward AC. Phylogeny, Diversity and Molecular Diagnostics of *Ralstonia solanacearum*. Bacterial Wilt Disease, Molecular and Ecological Aspects. 1998. pp. 19–33.
41. Mao GZ, He LY. Relationship of Wild Type Strain Motility and Interaction with Host Plants in *Ralstonia solanacearum*. Bacterial Wilt Disease, Molecular and Ecological Aspects. 1998. pp. 184–191.
42. Nicole JF, Cheron JJ, Girard JC, Luisetti J. A Tentative Explanation of the Distribution, on Reunion Island, of Bacterial Wilt Caused by Either Biovar 2 or Biovar 3 of *Ralstonia solanacearum*. Bacterial Wilt Disease, Molecular and Ecological Aspects. 1998. pp. 343–350.
43. Raymundo AK, Aves-Ilagon Y, Denny TP. Analysis of Genetic Variation of a Population of Banana Infecting Strains of *Ralstonia solanacearum*. Bacterial Wilt Disease, Molecular and Ecological Aspects. 1998. pp. 56–60.
44. Robertson AE. Factors Affecting the Population of *Ralstonia solanacearum* in a Naturally Infested Field Planted to Tobacco. Bacterial Wilt Disease, Molecular and Ecological Aspects. 1998. pp. 369–378.

45. Silveira EB, Michereff SJ, Mariano RLR. Epidemiology of Tomato Bacterial Wilt in Agreste Region of Pernambuco State, Brazil. Bacterial Wilt Disease, Molecular and Ecological Aspects. 1998. pp. 358–363.
46. Smith JJ, Kibata GN, Murimi ZK, Lum KY, Fernandez-Northcote E, Offord LC, et al. Biogeographic Studies on *Ralstonia solanacearum* Race I and 3 by Genomic Fingerprinting. Bacterial Wilt Disease, Molecular and Ecological Aspects. 1998. pp. 50–55.
47. Stefanova M. Current Situation of Bacterial Wilt (*Ralstonia solanacearum* Smith) in Cuba. Bacterial Wilt Disease, Molecular and Ecological Aspects. 1998. pp. 364–368.
48. Hayward AC, Elphinstone IG, Caffier D, Lanse D, Stefani E, French ER, et al. Round Table on Bacterial Wilt (Brown Rot) of Potato. Bacterial Wilt Disease, Molecular and Ecological Aspects. 1998. pp. 420–430.
49. Boudazin G, Claire Le Roux A, Josi K, Labarre P, Jouan B. Design of Division Specific Primers of *Ralstonia solanacearum* and Application to the Identification of European Isolates. Eur J Plant Pathol. 1999;105: 373–380. doi:10.1023/A:1008763111230
50. Lin, Hsu, Tzeng. Weed hosts of *Ralstonia solanacearum* in Taiwan. Plant Protection Bulletin (Taipei). 1999. Available: <https://www.cabdirect.org/cabdirect/abstract/20002301682>
51. Wenneker M, Verdel MSW, Groeneveld RMW, Kempenaar C, van Beuningen AR, Janse JD. *Ralstonia (Pseudomonas) solanacearum* Race 3 (Biovar 2) in surface water and natural weed hosts: first report on stinging nettle (*Urtica dioica*). Eur J Plant Pathol. 1999;105: 307–315. doi:10.1023/A:1008795417575
52. Dhital SP, Thaveechai N, Shrestha SK. Characteristics of *Ralstonia solanacearum* Strains of Potato Wilt Disease from Nepal and Thailand. Nepal Agric Res J. 2001; 42–47. doi:10.3126/narj.v4i0.4868
53. Coelho Netto RA, Noda H, Boher B. *Melanthera discoidea*: Um novo hospedeiro de *Ralstonia solanacearum*. Fitopatol Bras. 2001;26: 781–781. doi:10.1590/S0100-41582001000400020
54. Lee Yung-An, Fan Shu-Chung, Chiu Ling-Ya, Hsia Kuo-Chiang. Isolation of an Insertion Sequence from *Ralstonia solanacearum* Race 1 and Its Potential Use for Strain Characterization and Detection. Appl Environ Microbiol. 2001;67: 3943–3950. doi:10.1128/AEM.67.9.3943-3950.2001
55. Pradhanang PM, Elphinstone JG, Fox RTV. Identification of crop and weed hosts of *Ralstonia solanacearum* biovar 2 in the hills of Nepal. Plant Pathol. 2000;49: 403–413. doi:10.1046/j.1365-3059.2000.00480.x
56. Coelho Netto RA, Pereira BG, Noda H, Boher B. Murcha bacteriana no estado do Amazonas, Brasil. Fitopatol Bras. 2004;29: 17–23. doi:10.1590/S0100-41582004000100004
57. Dittapongpitch V, Surat S. Detection of *Ralstonia solanacearum* in soil and weeds from commercial tomato fields using immunocapture and the polymerase chain reaction. J Phytopathol. 2003;151: 239–246. doi:10.1046/j.1439-0434.2003.00714.x
58. Belalcázar, Rosales. El “Moko” del plátano y banano y el rol de las plantas hospederas en su epidemiología. Manejo convencional y. 2003. Available: <https://books.google.com/books?hl=en&lr=&id=Oez07rNnVloC&oi=fnd&pg=PA159&dq=moko+belalcazar&ots=fZjKlvKEJU&sig=e5kUhJCWLa55oRFFmDDIC04JL2M>

59. Kumar A, Sarma YR. Characterization of *Ralstonia solanacearum* causing bacterial wilt of ginger in India. 2004;57: 12–17. Available: <http://dx.doi.org/>
60. Castillo JA, Greenberg JT. Evolutionary dynamics of *Ralstonia solanacearum*. Appl Environ Microbiol. 2007;73: 1225–1238. doi:10.1128/AEM.01253-06
61. Fouché-Weich J, Poussier S, Trigalet-Demery D, Berger D, Coutinho T. Molecular identification of some African strains of *Ralstonia solanacearum* from eucalypt and potato. J Gen Plant Pathol. 2006;72: 369–373. doi:10.1007/s10327-006-0307-7
62. Ji P, Allen C, Sanchez-Perez A, Yao J, Elphinstone JG, Jones JB, et al. New diversity of *Ralstonia solanacearum* strains associated with vegetable and ornamental crops in Florida. Plant Dis. 2007;91: 195–203. doi:10.1094/PDIS-91-2-0195
63. Lewis Ivey ML, Gardener BBM, Opina N, Miller SA. Diversity of *Ralstonia solanacearum* Infecting Eggplant in the Philippines. Phytopathology. 2007;97: 1467–1475. doi:10.1094/PHYTO-97-11-1467
64. Wicker E, Grassart L, Coranson-Beaudu R, Mian D, Guilbaud C, Fegan M, et al. *Ralstonia solanacearum* strains from Martinique (French West Indies) exhibiting a new pathogenic potential. Appl Environ Microbiol. 2007;73: 6790–6801. doi:10.1128/AEM.00841-07
65. Black R, Seal S, Abubakar Z, Nono-Womdim R, Swai I. Wilt Pathogens of Solanaceae in Tanzania: *Clavibacter michiganensis* subsp. *michiganensis*, *Pseudomonas corrugata*, and *Ralstonia solanacearum*. Plant Dis. 1999;83: 1070. doi:10.1094/PDIS.1999.83.11.1070A
66. Horita M, Tsuchiya K. Genetic Diversity of Japanese Strains of *Ralstonia solanacearum*. Phytopathology. 2001;91: 399–407. doi:10.1094/PHYTO.2001.91.4.399
67. Jeong Y, Kim J, Kang Y, Lee S, Hwang I. Genetic Diversity and Distribution of Korean Isolates of *Ralstonia solanacearum*. Plant Dis. 2007;91: 1277–1287. doi:10.1094/PDIS-91-10-1277
68. Lemessa F, Zeller W. Isolation and characterisation of *Ralstonia solanacearum* strains from Solanaceae crops in Ethiopia. J Basic Microbiol. 2007;47: 40–49. doi:10.1002/jobm.200610199
69. Obregón. Diagnóstico, hospederos y sobrevivencia de la bacteria *Ralstonia solanacearum* en banano y aplicaciones al control integrado de la enfermedad en la .... Universidad Nacional de Colombia, Medellín. 2007.
70. Seo S-T, Park J-H, Han K-S, Cheong S-R, Lee S-D. Genetic Diversity of *Ralstonia solanacearum* Strains Isolated from Pepper and Tomato Plants in Korea. Research in Plant Disease. 2007;13: 24–29. doi:10.5423/RPD.2007.13.1.024
71. Yu Q, Alvarez AM, Moore PH, Zee F, Kim MS, de Silva A, et al. Molecular diversity of *Ralstonia solanacearum* isolated from ginger in Hawaii. Phytopathology. 2003;93: 1124–1130. doi:10.1094/PHYTO.2003.93.9.1124
72. Hong JC, Momol MT, Jones JB, Ji P, Olson SM, Allen C, et al. Detection of *Ralstonia solanacearum* in irrigation ponds and aquatic weeds associated with the ponds in North Florida. Plant Dis. 2008;92: 1674–1682. doi:10.1094/PDIS-92-12-1674
73. Sanchez Perez A, Mejia L, Fegan M, Allen C. Diversity and distribution of *Ralstonia solanacearum* strains in Guatemala and rare occurrence of tomato fruit infection. Plant Pathol. 2008. Available: <https://bsppjournals.onlinelibrary.wiley.com/doi/abs/10.1111/j.1365-3059.2007.01769.x>

74. Coutinho TA, Roux J, Riedel K-H, Terblanche J, Wingfield MJ. First report of bacterial wilt caused by *Ralstonia solanacearum* on eucalypts in South Africa. For Pathol. 2000;30: 205–210. doi:10.1046/j.1439-0329.2000.00205.x
75. Kagona. The incidence of bacterial wilt (*Ralstonia solanacearum*) in informal potato planting materials used by farmers in dedza and ntcheu districts of Malawi. M.S. , Norwegian University of Life Sciences. 2008. Available: [http://www.umb.no/statisk/noragric/publications/master/2008\\_justin\\_dickson\\_zayamba\\_kagona.pdf](http://www.umb.no/statisk/noragric/publications/master/2008_justin_dickson_zayamba_kagona.pdf)
76. Khakvar R, Sijam K, Wong MY, Radu S, Jones J, Thong KL. Genomic diversity of *Ralstonia solanacearum* strains isolated from banana farms in west Malaysia. Plant Pathol J. 2008;7: 162–167. doi:10.3923/ppj.2008.162.167
77. Norman DJ, Zapata M, Gabriel DW, Duan YP, Yuen JMF, Mangravita-Novo A, et al. Genetic diversity and host range variation of *Ralstonia solanacearum* strains entering North America. Phytopathology. 2009;99: 1070–1077. doi:10.1094/PHYTO-99-9-1070
78. Nouri S, Bahar M, Fegan M. Diversity of *Ralstonia solanacearum* causing potato bacterial wilt in Iran and the first record of phylotype II/biovar 2T strains outside South America. Plant Pathol. 2009;58: 243–249. doi:10.1111/j.1365-3059.2008.01944.x
79. Mahbou Somo Toukam G, Cellier G, Wicker E, Guilbaud C, Kahane R, Allen C, et al. Broad Diversity of *Ralstonia solanacearum* Strains in Cameroon. Plant Dis. 2009;93: 1123–1130. doi:10.1094/PDIS-93-11-1123
80. Wicker E, Grassart L, Coranson-Beaudu R, Mian D, Prior P. Epidemiological evidence for the emergence of a new pathogenic variant of *Ralstonia solanacearum* in Martinique (French West Indies). Plant Pathol. 2009;58: 853–861. doi:10.1111/j.1365-3059.2009.02098.x
81. Guidot A, Elbaz M, Carrère S, Siri MI, Pianzola MJ, Prior P, et al. Specific genes from the potato brown rot strains of *Ralstonia solanacearum* and their potential use for strain detection. Phytopathology. 2009;99: 1105–1112. doi:10.1094/PHYTO-99-9-1105
82. Liu Y, Kanda A, Yano K, Kiba A, Hikichi Y, Aino M, et al. Molecular typing of Japanese strains of *Ralstonia solanacearum* in relation to the ability to induce a hypersensitive reaction in tobacco. J Gen Plant Pathol. 2009;75: 369–380. doi:10.1007/s10327-009-0188-7
83. Ramírez M, Moncada RN, Villegas-Escobar V, Jackson RW, Ramírez CA. Phylogenetic and pathogenic variability of strains of *Ralstonia solanacearum* causing moko disease in Colombia. Plant Pathol. 2020;69: 360–369. doi:10.1111/ppa.13121
84. Xu J, Pan ZC, Prior P, Xu JS, Zhang Z, Zhang H, et al. Genetic diversity of *Ralstonia solanacearum* strains from China. Eur J Plant Pathol. 2009;125: 641–653. doi:10.1007/s10658-009-9512-5
85. Cellier G, Prior P. Deciphering Phenotypic Diversity of *Ralstonia solanacearum* Strains Pathogenic to Potato. Phytopathology®. 2010;100: 1250–1261. doi:10.1094/PHYTO-02-10-0059
86. Horita M, Suga Y, Ooshiro A, Tsuchiya K. Analysis of genetic and biological characters of Japanese potato strains of *Ralstonia solanacearum*. J Gen Plant Pathol. 2010;76: 196–207. doi:10.1007/s10327-010-0229-2



87. Li J-G, Liu H-X, Cao J, Chen L-F, Gu C, Allen C, et al. PopW of *Ralstonia solanacearum*, a new two-domain harpin targeting the plant cell wall. *Mol Plant Pathol*. 2010;11: 371–381. doi:10.1111/j.1364-3703.2010.00610.x
88. Khoodoo MHR, Ganoo ES, Saumtally AS. Molecular Characterization and Epidemiology of *Ralstonia solanacearum* Race 3 biovar 2 Causing Brown Rot of Potato in Mauritius. *J Phytopathol*. 2010;158: 503–512. doi:10.1111/j.1439-0434.2009.01654.x
89. Singh, Sinha, Yadav, Sharma. Characterization of biovar/races of *Ralstonia solanacearum*, the incitant of bacterial wilt in solanaceous crops. *Indian J Clin Biochem*. 2010. Available: [https://www.researchgate.net/profile/Dhananjay-Yadav-2/publication/326569728\\_Characterization\\_of\\_biovar\\_races\\_of\\_Ralstonia\\_solanacearum\\_the\\_incitant\\_of\\_bacterial\\_wilt\\_in\\_solanaceous\\_crops/links/5b568c2445851507a7c40bf4/Characterization-of-biovar-races-of-Ralstonia-solanacearum-the-incitant-of-bacterial-wilt-in-solanaceous-crops.pdf](https://www.researchgate.net/profile/Dhananjay-Yadav-2/publication/326569728_Characterization_of_biovar_races_of_Ralstonia_solanacearum_the_incitant_of_bacterial_wilt_in_solanaceous_crops/links/5b568c2445851507a7c40bf4/Characterization-of-biovar-races-of-Ralstonia-solanacearum-the-incitant-of-bacterial-wilt-in-solanaceous-crops.pdf)
90. Stevens P, van Elsas JD. Genetic and phenotypic diversity of *Ralstonia solanacearum* biovar 2 strains obtained from Dutch waterways. *Antonie Van Leeuwenhoek*. 2010;97: 171–188. doi:10.1007/s10482-009-9400-1
91. Kubota R, Schell MA, Peckham GD, Rue J, Alvarez AM, Allen C, et al. In silico genomic subtraction guides development of highly accurate, DNA-based diagnostics for *Ralstonia solanacearum* race 3 biovar 2 and blood disease bacterium. *J Gen Plant Pathol*. 2011;77: 182–193. doi:10.1007/s10327-011-0305-2
92. Lebeau A, Daunay M-C, Frary A, Palloix A, Wang J-F, Dintinger J, et al. Bacterial wilt resistance in tomato, pepper, and eggplant: genetic resources respond to diverse strains in the *Ralstonia solanacearum* species complex. *Phytopathology*. 2011;101: 154–165. doi:10.1094/PHYTO-02-10-0048
93. Pinheiro CR, Amorim JAE, Diniz LEC, Silva AMF da, Talamini V, Souza Júnior MT. Diversidade genética de isolados de *Ralstonia solanacearum* e caracterização molecular quanto a filotipos e sequevares. *Pesqui Agropecu Bras*. 2011;46: 593–602. doi:10.1590/S0100-204X2011000600004
94. Remenant B, de Cambiaire J-C, Cellier G, Jacobs JM, Mangenot S, Barbe V, et al. *Ralstonia syzygii*, the Blood Disease Bacterium and Some Asian *R. solanacearum* Strains Form a Single Genomic Species Despite Divergent Lifestyles. *PLoS One*. 2011;6: e24356. doi:10.1371/journal.pone.0024356
95. Siri MI, Sanabria A, Pianzola MJ. Genetic Diversity and Aggressiveness of *Ralstonia solanacearum* Strains Causing Bacterial Wilt of Potato in Uruguay. *Plant Dis*. 2011;95: 1292–1301. doi:10.1094/PDIS-09-10-0626
96. Xue Q-Y, Yin Y-N, Yang W, Heuer H, Prior P, Guo J-H, et al. Genetic diversity of *Ralstonia solanacearum* strains from China assessed by PCR-based fingerprints to unravel host plant- and site-dependent distribution patterns. *FEMS Microbiol Ecol*. 2011;75: 507–519. doi:10.1111/j.1574-6941.2010.01026.x
97. Li Z, Wu S, Bai X, Liu Y, Lu J, Liu Y, et al. Genome sequence of the tobacco bacterial wilt pathogen *Ralstonia solanacearum*. *J Bacteriol*. 2011;193: 6088–6089. doi:10.1128/JB.06009-11
98. Chaudhry, Rashid. Isolation and characterization of *Ralstonia solanacearum* from infected tomato plants of Soan Skesar valley of Punjab. *Pak J Bot*. 2011. Available: [https://www.academia.edu/download/61150112/55\\_Potato20191106-37160-1z0yurr.pdf](https://www.academia.edu/download/61150112/55_Potato20191106-37160-1z0yurr.pdf)

99. Mondal, Bhattacharya, Khatua. Crop and weed host of *Ralstonia solanacearum* in West Bengal. *Journal of Crop and Weed*. 2011. Available: <https://www.cabi.org/ISC/FullTextPDF/2014/20143063677.pdf>
100. Cellier G, Remenant B, Chiroleu F, Lefeuvre P, Prior P. Phylogeny and population structure of brown rot- and Moko disease-causing strains of *Ralstonia solanacearum* phylotype II. *Appl Environ Microbiol*. 2012;78: 2367–2375. doi:10.1128/AEM.06123-11
101. N'guessan CA, Abo K, Fondio L, Chiroleu F, Lebeau A, Poussier S, et al. So near and yet so far: the specific case of *Ralstonia solanacearum* populations from Côte d'Ivoire in Africa. *Phytopathology*. 2012;102: 733–740. doi:10.1094/PHYTO-11-11-0300
102. Hong JC, Norman DJ, Reed DL, Momol MT, Jones JB. Diversity among *Ralstonia solanacearum* strains isolated from the Southeastern United States. *Phytopathology*. 2012;102: 924–936. doi:10.1094/phyto-12-11-0342
103. Wairuri CK, van der Waals JE, van Schalkwyk A, Theron J. *Ralstonia solanacearum* needs Flp pili for virulence on potato. *Mol Plant Microbe Interact*. 2012;25: 546–556. doi:10.1094/MPMI-06-11-0166
104. Cao Y, Tian B, Liu Y, Cai L, Wang H, Lu N, et al. Genome Sequencing of *Ralstonia solanacearum* FQY\_4, Isolated from a Bacterial Wilt Nursery Used for Breeding Crop Resistance. *Genome Announc*. 2013;1. doi:10.1128/genomeA.00125-13
105. Garcia AL, Lima WG, Souza EB, Michereff SJ, Mariano RLR. Characterization of *Ralstonia solanacearum* causing bacterial wilt in bell pepper in the state of Pernambuco, Brazil. *J Plant Pathol*. 2013;95: 237–245. Available: <http://www.jstor.org/stable/23721514>
106. Izadiyan M, Taghavi SM. Host range variation and genetic diversity of Iranian isolates of *Ralstonia solanacearum* from potato and tomato with RAPD and (GTG)<sub>5</sub>-PCR. *J Plant Pathol*. 2013;95: 87–97. Available: <http://www.jstor.org/stable/23721740>
107. N'guessan CA, Brisse S, Le Roux-Nio A-C, Poussier S, Koné D, Wicker E. Development of variable number of tandem repeats typing schemes for *Ralstonia solanacearum*, the agent of bacterial wilt, banana Moko disease and potato brown rot. *J Microbiol Methods*. 2013;92: 366–374. doi:10.1016/j.mimet.2013.01.012
108. Pan ZC, Xu J, Prior P, Xu JS, Zhang H, Chen KY, et al. Development of a specific molecular tool for the detection of epidemiologically active mulberry causing-disease strains of *Ralstonia solanacearum* phylotype I (historically race 5-biovar 5) in China. *Eur J Plant Pathol*. 2013;137: 377–391. Available: [https://idp.springer.com/authorize/casa?redirect\\_uri=https://link.springer.com/article/10.1007/s10658-013-0249-9&casa\\_token=SRqx6fKvn0AAAAA:W2Y0yW7TOoI6xE3C-2W0ldQZ3IYr-2ZbkPM7hFrWg-k9GQz8IJD5FvXlknP-K7v9DlRkhAMv0I-\\_XRzu](https://idp.springer.com/authorize/casa?redirect_uri=https://link.springer.com/article/10.1007/s10658-013-0249-9&casa_token=SRqx6fKvn0AAAAA:W2Y0yW7TOoI6xE3C-2W0ldQZ3IYr-2ZbkPM7hFrWg-k9GQz8IJD5FvXlknP-K7v9DlRkhAMv0I-_XRzu)
109. Parkinson N, Bryant R, Bew J, Conyers C, Stones R, Alcock M, et al. Application of variable-number tandem-repeat typing to discriminate *Ralstonia solanacearum* strains associated with English watercourses and disease outbreaks. *Appl Environ Microbiol*. 2013;79: 6016–6022. doi:10.1128/AEM.01219-13
110. Waki T, Horita M, Kurose D, Mulya K, Tsuchiya K. Genetic Diversity of Zingiberaceae Plant Isolates of *Ralstonia solanacearum* in the Asia-Pacific Region. *Japan Agricultural Research Quarterly: JARQ*. 2013;47: 283–294. doi:10.6090/jarq.47.283

111. Ahmed N, Islam M, Hossain M, Meah M, Hossain M. Determination of Races and Biovars of *Ralstonia solanacearum* Causing Bacterial Wilt Disease of Potato. J Agric Sci. 2013;5: 86. doi:10.5539/jas.v5n6p86
112. Kumar R, Barman A, Jha G, Ray SK. Identification and establishment of genomic identity of *Ralstonia solanacearum* isolated from a wilted chilli plant at Tezpur, North East India. Curr Sci. 2013;105: 1571–1578. Available: <http://www.jstor.org/stable/24098856>
113. Pradhanang PM, Momol MT. Survival of *Ralstonia solanacearum* in soil under irrigated rice culture and aquatic weeds. J Phytopathol. 2001;149: 707–711. doi:10.1046/j.1439-0434.2001.00700.x
114. Albuquerque GMR, Santos LA, Felix KCS, Rollemberg CL, Silva AMF, Souza EB, et al. Moko disease-causing strains of *Ralstonia solanacearum* from Brazil extend known diversity in paraphyletic Phylotype II. Phytopathology. 2014;104: 1175–1182. doi:10.1094/PHYTO-12-13-0334-R
115. Lin C-H, Tsai K-C, Prior P, Wang J-F. Phylogenetic relationships and population structure of *Ralstonia solanacearum* isolated from diverse origins in Taiwan. Plant Pathol. 2014;63: 1395–1403. doi:10.1111/ppa.12209
116. Fonseca NR, Guimarães LMS, Hermenegildo PS, Teixeira RU, Lopes CA, Alfenas AC. Molecular characterization of *Ralstonia solanacearum* infecting *Eucalyptus* spp. in Brazil. For Pathol. 2014;44: 107–116. doi:10.1111/efp.12073
117. Horita M, Tsuchiya K, Suga Y, Yano K, Waki T, Kurose D, et al. Current classification of *Ralstonia solanacearum* and genetic diversity of the strains in Japan. J Gen Plant Pathol. 2014;80: 455–465. doi:10.1007/s10327-014-0537-z
118. Kumar A, Prameela TP, Panja B. Genetic characterization of an Indian isolate of *Ralstonia solanacearum* race 3/ biovar 2/ phylotype IIB from potato. 2014 [cited 24 Mar 2021]. Available: <https://api.semanticscholar.org/CorpusID:82677467>
119. Sagar V, Jeevalatha A, Mian S, Chakrabarti SK, Gurjar MS, Arora RK, et al. Potato bacterial wilt in India caused by strains of phylotype I, II and IV of *Ralstonia solanacearum*. Eur J Plant Pathol. 2014;138: 51–65. doi:10.1007/s10658-013-0299-z
120. Siri MI, Sanabria A, Boucher C, Pianzola MJ. New type IV pili-related genes involved in early stages of *Ralstonia solanacearum* potato infection. Mol Plant Microbe Interact. 2014;27: 712–724. doi:10.1094/MPMI-07-13-0210-R
121. Sujeeun L. Rôle des effecteurs de type III dans l'interaction *Ralstonia solanacearum*/ aubergine: approches de génétique évolutive et fonctionnelle. Université de la Réunion. 2014. Available: <https://agritrop.cirad.fr/573610/>
122. Waki T, Horita M. Grouping of *Ralstonia solanacearum* strains in Tochigi Prefecture based on pathogenicity to Solanum plants and discriminating pathogenicity groups by PCR. Jpn J Phytopathol. 2014;80: 229–234. doi:10.3186/jjphytopath.80.229
123. Zulperi D, Sijam K, Ahmad ZAM, Awang Y, Mohd Hata E. Phylotype classification of *Ralstonia solanacearum* biovar 1 strains isolated from banana (*Musa* spp.) in Malaysia. Archives of Phytopathology and Plant Protection. 2014;47: 2352–2364. doi:10.1080/03235408.2013.876748
124. Deberdt P, Guyot J, Coranson-Beaudu R, Launay J, Noreskal M, Rivière P, et al. Diversity of *Ralstonia solanacearum* in French Guiana Expands Knowledge of the “Emerging Ecotype.” Phytopathology®. 2014;104: 586–596. doi:10.1094/PHYTO-09-13-0264-R

125. Ajitomi A, Inoue Y, Horita M, Nakaho K. Bacterial wilt of three *Curcuma* species, *C. longa* (turmeric), *C. aromatica* (wild turmeric) and *C. zedoaria* (zedoary) caused by *Ralstonia solanacearum* in Japan. *J Gen Plant Pathol.* 2015;81: 315–319. doi:10.1007/s10327-015-0596-9
126. Albuquerque P, Marcal ARS, Caridade C, Costa R, Mendes MV, Tavares F. A quantitative hybridization approach using 17 DNA markers for identification and clustering analysis of *Ralstonia solanacearum*. *Plant Pathol.* 2015;64: 1270–1283. doi:10.1111/ppa.12386
127. Ayin CM, Schlub RL, Yasuhara-Bell J, Alvarez AM. Identification and characterization of bacteria associated with decline of ironwood (*Casuarina equisetifolia*) in Guam. *Australas Plant Pathol.* 2015;44: 225–234. doi:10.1007/s13313-014-0341-4
128. Cellier G, Moreau A, Chabirand A, Hostachy B, Ailloud F, Prior P. A duplex PCR assay for the detection of *Ralstonia solanacearum* phylotype II strains in *Musa* spp. *PLoS One.* 2015;10: e0122182. doi:10.1371/journal.pone.0122182
129. Clarke CR, Studholme DJ, Hayes B, Runde B, Weisberg A, Cai R, et al. Genome-enabled phylogeographic investigation of the quarantine pathogen *Ralstonia solanacearum* Race 3 Biovar 2 and screening for sources of resistance against its core effectors. *Phytopathology.* 2015;105: 597–607. doi:10.1094/PHYTO-12-14-0373-R
130. Naranjo Feliciano E, Yglesia Lozano A, García A, Martínez Zubiaur Y. Diversidad genética de aislados de *Ralstonia solanacearum* de Cuba, mediante amplificación de las regiones repetitivas del genoma (REP-PCR). *Rev Protección Veg.* 2015;30: 52–59. Available: [http://scielo.sld.cu/scielo.php?pid=S1010-27522015000100009&script=sci\\_arttext&tlng=pt](http://scielo.sld.cu/scielo.php?pid=S1010-27522015000100009&script=sci_arttext&tlng=pt)
131. Gurjar MS, Sagar V, Bag TK, Singh BP, Sharma S, Jeevalatha A, et al. Genetic diversity of *Ralstonia solanacearum* strains causing bacterial wilt of potato in the Meghalaya state of India. *J Plant Pathol.* 2015;97: 135–142. Available: <http://www.jstor.org/stable/24579140>
132. Gutarra L, Kreuze J, Lindqvist-Kreuze H, De Mendiburu F. Variation of resistance to different strains of *Ralstonia solanacearum* in highland tropics adapted potato genotypes. *Am J Potato Res.* 2015;92: 258–265. doi:10.1007/s12230-014-9426-4
133. Lopes CA, Rossato M, Boiteux LS. The host status of coffee (*Coffea arabica*) to *Ralstonia solanacearum* phylotype I isolates. *Trop Plant Pathol.* 2015;40: 1–4. doi:10.1007/s40858-014-0001-9
134. Sikirou R, Zocli B, Paret ML, Deberdt P, Coranson-Beaudu R, Huat J, et al. First report of bacterial wilt of gboma (*Solanum macrocarpon*) caused by *Ralstonia solanacearum* in Benin. *Plant Dis.* 2015;99: 1640–1640. doi:10.1094/PDIS-02-15-0213-PDN
135. Stulberg MJ, Shao J, Huang Q. A multiplex PCR assay to detect and differentiate Select Agent strains of *Ralstonia solanacearum*. *Plant Dis.* 2015;99: 333–341. doi:10.1094/PDIS-05-14-0483-RE
136. Stulberg MJ, Huang Q. A TaqMan-based multiplex qPCR assay and DNA extraction method for phylotype IIB sequevars 1 & 2 (Select Agent) strains of *Ralstonia solanacearum*. *PLoS One.* 2015;10: e0139637. doi:10.1371/journal.pone.0139637
137. Wang H, Huang Y, Wang J, Wang M, Xia H, Lu H. Phenotypic fingerprints of *Ralstonia solanacearum* biovar 3 strains from tobacco and tomato in China assessed by phenotype MicroArray analysis. *Plant Pathol J.* 2015;14: 38–43. doi:10.3923/ppj.2015.38.43

138. Bhunchoth A, Phironrit N, Leksomboon C, Chatchawankanphanich O, Kotera S, Narulita E, et al. Isolation of *Ralstonia solanacearum*-infecting bacteriophages from tomato fields in Chiang Mai, Thailand, and their experimental use as biocontrol agents. *J Appl Microbiol.* 2015;118: 1023–1033. doi:10.1111/jam.12763
139. Popoola AR, Ganiyu SA, Enikuomehin OA, Bodunde JG, Adedibu OB, Durosomo HA, et al. Isolation and Characterization of *Ralstonia solanacearum* Causing Bacterial Wilt of Tomato in Nigeria. *Nigerian J Biotechnol.* 2015;29: 1–10. doi:10.4314/njb.v29i1.1
140. Li Y, Feng J, Liu H, Wang L, Hsiang T, Li X, et al. Genetic diversity and pathogenicity of *Ralstonia solanacearum* causing tobacco bacterial wilt in China. *Plant Dis.* 2016;100: 1288–1296. doi:10.1094/PDIS-04-15-0384-RE
141. Ravelomanantsoa S, Robène I, Chiroleu F, Guérin F, Poussier S, Pruvost O, et al. A novel multilocus variable number tandem repeat analysis typing scheme for African phylotype III strains of the *Ralstonia solanacearum* species complex. *PeerJ.* 2016;4: e1949. doi:10.7717/peerj.1949
142. Sánchez JAO. Variabilidad genética de la bacteria *Ralstonia solanacearum* de cepas aisladas de plátano en México. Centro de Investigación Científica de Yucatán. 2016. Available: <https://pdfs.semanticscholar.org/2a5f/21145faea3ad1b56ddb52117000a45c50268.pdf>
143. Ayana G. Diversity and phylotype analysis of *Ralstonia solanacearum* strains causing tomato and potato bacterial wilt in Ethiopia. *Pest Management Journal of Ethiopia.* 2016 [cited 24 Mar 2021]. Available: [https://www.researchgate.net/profile/Muluken\\_Goftishu/publication/315537001\\_Evaluation\\_of\\_Neem\\_Seed\\_and\\_Citrus\\_Peel\\_Powder\\_for\\_the\\_Management\\_of\\_Maize\\_Weevil\\_Sitophilus\\_zeama\\_is\\_Motsch\\_Coleoptera\\_Curculionidae\\_in\\_Sorghum/links/59079aa20f7e9bc0d59a7d10/Evaluation-of-Neem-Seed-and-Citrus-Peel-Powder-for-the-Management-of-Maize-Weevil-Sitophilus-zeamais-Motsch-Coleoptera-Curculionidae-in-Sorghum.pdf](https://www.researchgate.net/profile/Muluken_Goftishu/publication/315537001_Evaluation_of_Neem_Seed_and_Citrus_Peel_Powder_for_the_Management_of_Maize_Weevil_Sitophilus_zeama_is_Motsch_Coleoptera_Curculionidae_in_Sorghum/links/59079aa20f7e9bc0d59a7d10/Evaluation-of-Neem-Seed-and-Citrus-Peel-Powder-for-the-Management-of-Maize-Weevil-Sitophilus-zeamais-Motsch-Coleoptera-Curculionidae-in-Sorghum.pdf)
144. Albuquerque GMR, Souza EB, Silva AMF, Lopes CA, Boiteux LS, Fonseca ME de N. Genome sequence of *Ralstonia pseudosolanacearum* strains with compatible and incompatible interactions with the major tomato resistance source Hawaii 7996. *Genome Announc.* 2017;5. doi:10.1128/genomeA.00982-17
145. Caruso P, Biosca EG, Bertolini E, Marco-Noales E, Gorris MT, Licciardello C, et al. Genetic diversity reflects geographical origin of *Ralstonia solanacearum* strains isolated from plant and water sources in Spain. *Int Microbiol.* 2017;20: 155–164. doi:10.2436/20.1501.01.298
146. Du H, Chen B, Zhang X, Zhang F, Miller SA, Rajashekara G, et al. Evaluation of *Ralstonia solanacearum* infection dynamics in resistant and susceptible pepper lines using bioluminescence imaging. *Plant Dis.* 2017;101: 272–278. doi:10.1094/PDIS-05-16-0714-RE
147. Kyaw HWW, Tsuchiya K, Matsumoto M, Iiyama K, Aye SS, Zaw M, et al. Genetic diversity of *Ralstonia solanacearum* strains causing bacterial wilt of solanaceous crops in Myanmar. *J Gen Plant Pathol.* 2017;83: 216–225. doi:10.1007/s10327-017-0720-0
148. Liu Y, Wu D, Liu Q, Zhang S, Tang Y, Jiang G, et al. The sequevar distribution of *Ralstonia solanacearum* in tobacco-growing zones of China is structured by elevation. *Eur J Plant Pathol.* 2017;147: 541–551. doi:10.1007/s10658-016-1023-6
149. Rossato M, Santiago TR, Mizubuti ESG, Lopes CA. Characterization and pathogenicity to geranium of Brazilian strains of *Ralstonia* spp. *Trop Plant Pathol.* 2017;42: 458–467. doi:10.1007/s40858-017-0177-x

150. She X, Yu L, Lan G, Tang Y, He Z. Identification and genetic characterization of *Ralstonia solanacearum* species complex isolates from *Cucurbita maxima* in China. *Frontiers in Plant Science*. 2017;8. doi:10.3389/fpls.2017.01794
151. Wang L, Wang B, Zhao G, Cai X, Jabaji S, Seguin P, et al. Genetic and pathogenic diversity of *Ralstonia solanacearum* causing potato brown rot in China. *Am J Potato Res*. 2017;94: 403–416. doi:10.1007/s12230-017-9576-2
152. Yahiaoui N, Chéron J-J, Ravelomanantsoa S, Hamza AA, Petrouse B, Jeetah R, et al. Genetic diversity of the *Ralstonia solanacearum* species complex in the Southwest Indian Ocean Islands. *Front Plant Sci*. 2017;8: 2139. doi:10.3389/fpls.2017.02139
153. Gutarra L, Herrera J, Fernandez E, Kreuze J, Lindqvist-Kreuze H. Diversity, pathogenicity, and current occurrence of bacterial wilt bacterium *Ralstonia solanacearum* in Peru. *Front Plant Sci*. 2017;8: 1221. doi:10.3389/fpls.2017.01221
154. Bocsanczy AM, Huguet-Tapia JC, Norman DJ. Comparative Genomics of *Ralstonia solanacearum* Identifies Candidate Genes Associated with Cool Virulence. *Front Plant Sci*. 2017;8: 1565. doi:10.3389/fpls.2017.01565
155. Chen D, Liu B, Zhu Y, Wang J, Chen Z, Che J, et al. Complete Genome Sequence of *Ralstonia solanacearum* FJAT-1458, a Potential Biocontrol Agent for Tomato Wilt. *Genome Announc*. 2017;5. doi:10.1128/genomeA.00070-17
156. Bergsma-Vlami M, van de Bilt JIJ, Tjou-Tam-Sin NNA, Westenberg M, Meekes ETM, Teunissen HAS, et al. Phylogenetic Assignment of *Ralstonia pseudosolanacearum* (*Ralstonia solanacearum* Phylotype I) Isolated from *Rosa* spp. *Plant Dis*. 2018;102: 2258–2267. doi:10.1094/PDIS-09-17-1345-RE
157. Cho H, Song E-S, Lee YK, Lee S, Lee S-W, Jo A, et al. Analysis of genetic and pathogenic diversity of *Ralstonia solanacearum* causing potato bacterial wilt in Korea. *Plant Pathol J*. 2018;34: 23–34. doi:10.5423/PPJ.FT.09.2017.0203
158. Ravelomanantsoa S, Vernière C, Rieux A, Costet L, Chiroleu F, Arribat S, et al. Molecular epidemiology of bacterial wilt in the Madagascar highlands caused by Andean (phylotype IIB-1) and African (phylotype III) brown rot strains of the *Ralstonia solanacearum* species complex. *Front Plant Sci*. 2018;8: 2258. doi:10.3389/fpls.2017.02258
159. She X, He Z, Li H. Genetic structure and phylogenetic relationships of *Ralstonia solanacearum* strains from diverse origins in Guangdong Province, China. *J Phytopathol*. 2018;166: 177–186. doi:10.1111/jph.12674
160. Shutt VM, Shin G, van der Waals JE, Goszczynska T, Coutinho TA. Characterization of *Ralstonia* strains infecting tomato plants in South Africa. *Crop Prot*. 2018;112: 56–62. doi:10.1016/j.cropro.2018.05.013
161. Thano P, Akarapisan A. Phylotype and sequevar of *Ralstonia solanacearum* which causes bacterial wilt in *Curcuma alismatifolia* Gagnep. *Lett Appl Microbiol*. 2018;66: 384–393. doi:10.1111/lam.12857
162. Zhang YW, Chen Y, Hu CH, Li QQ, Lin W, Yuan GQ. Bacterial wilt caused by *Ralstonia pseudosolanacearum* (*R. solanacearum* phylotype I) on *Luffa cylindrica* in China. *J Plant Pathol*. 2018;100: 593–593. doi:10.1007/s42161-018-0098-7

163. Chesneau T, Maignien G, Boyer C, Chéron J-J, Roux-Cuvelier M, Vanhuffel L, et al. Sequevar Diversity and Virulence of *Ralstonia solanacearum* Phylotype I on Mayotte Island (Indian Ocean). *Front Plant Sci.* 2017;8: 2209. doi:10.3389/fpls.2017.02209
164. Weibel J, Tran TM, Bocsanczy AM, Daughtrey M, Norman DJ, Mejia L, et al. A *Ralstonia solanacearum* strain from Guatemala infects diverse flower crops, including new asymptomatic hosts vinca and sutera, and causes symptoms in geranium, mandevilla vine, and new host African daisy (*Osteospermum ecklonis*). *Plant Health Prog.* 2016;17: 114–121. Available: <https://apsjournals.apsnet.org/doi/abs/10.1094/PHP-RS-16-0001>
165. Chamedjeu RR, Masanga J, Matiru V, Runo S. Isolation and characterization of *Ralstonia solanacearum* strains causing bacterial wilt of potato in Nakuru County of Kenya. *AJB.* doi:10.5897/AJB2018.16659
166. Montecillo AD, Raymundo AK, Papa IA, Aquino GMB, Jacildo AJ, Stothard P, et al. Near-Complete Genome Sequence of *Ralstonia solanacearum* T523, a Phylotype I Tomato Phytopathogen Isolated from the Philippines. *Microbiol Resour Announc.* 2018;7. doi:10.1128/MRA.01048-18
167. Bocsanczy AM, Espindola AS, Norman DJ. Whole-genome sequences of *Ralstonia solanacearum* strains P816, P822, and P824, emerging pathogens of blueberry in Florida. *Microbiol Resour Announc.* 2019;8. doi:10.1128/MRA.01316-18
168. Izadiyan M, Taghavi SM. Characterization of Iranian *Ralstonia solanacearum* biovar 2 strains by partial sequencing of *egl*, *mutS* and *pga* genes. *Australas Plant Pathol.* 2019;48: 607–615. doi:10.1007/s13313-019-00664-w
169. Jimenez Madrid AM, Doyle VP, Ivey MLL. Characterization of *Ralstonia solanacearum* species complex strains causing bacterial wilt of tomato in Louisiana, USA. *Can J Plant Pathol.* 2019;41: 329–338. doi:10.1080/07060661.2019.1584588
170. Pardo JM, López-Alvarez D, Ceballos G, Alvarez E, Cuellar WJ. Detection of *Ralstonia solanacearum* phylotype II, race 2 causing Moko disease and validation of genetic resistance observed in the hybrid plantain FHIA-21. *Trop Plant Pathol.* 2019;44: 371–379. doi:10.1007/s40858-019-00282-3
171. Tan X, Qiu H, Li F, Cheng D, Zheng X, Wang B, et al. Complete genome sequence of sequevar 14M *Ralstonia solanacearum* strain HA4-1 reveals novel type III effectors acquired through horizontal gene transfer. *Front Microbiol.* 2019;10: 1893. doi:10.3389/fmicb.2019.01893
172. Abdurahman A, Parker ML, Kreuze J, Elphinstone JG, Struik PC, Kigundu A, et al. Molecular epidemiology of *Ralstonia solanacearum* species complex strains causing bacterial wilt of potato in Uganda. *Phytopathology.* 2019;109: 1922–1931. doi:10.1094/PHYTO-12-18-0476-R
173. Freitas RG, Hermenegildo PS, Guimarães LMS, Zauza EAV, Badel JL, Alfenas AC. Detection and characterization of *Ralstonia pseudosolanacearum* infecting *Eucalyptus* sp. in Brazil. *For Pathol.* 2020;50: e12593. doi:10.1111/efp.12593
174. Lee I, Kim YS, Kim J-W, Park DH. Genetic and Pathogenic Characterization of Bacterial Wilt Pathogen, *Ralstonia pseudosolanacearum* (*Ralstonia solanacearum* Phylotype I), on Roses in Korea. *Plant Pathol J.* 2020;36: 440–449. doi:10.5423/PPJ.OA.06.2020.0095
175. Pastou D, Chéron JJ, Cellier G, Guérin F, Poussier S. First report of *Ralstonia pseudosolanacearum* phylotype I causing bacterial wilt in New Caledonia. *Plant Dis.* 2020;104: 278. doi:10.1094/PDIS-05-19-1068-PDN

176. Paudel S, Dobhal S, Alvarez AM, Arif M. Taxonomy and Phylogenetic Research on *Ralstonia solanacearum* Species Complex: A Complex Pathogen with Extraordinary Economic Consequences. *Pathogens*. 2020;9. doi:10.3390/pathogens9110886
177. Rasoamanana H, Ravelomanantsoa S, Yahiaoui N, Dianzinga N, Rébert E, Gauche M-M, et al. Contrasting genetic diversity and structure among Malagasy *Ralstonia pseudosolanacearum* phylotype I populations inferred from an optimized Multilocus Variable Number of Tandem Repeat Analysis scheme. *PLoS One*. 2020;15: e0242846. doi:10.1371/journal.pone.0242846
178. Santiago TR, Lopes CA, Caetano-Anollés G, Mizubuti ESG. Genetic structure of *Ralstonia solanacearum* and *Ralstonia pseudosolanacearum* in Brazil. *Plant Dis*. 2020;104: 1019–1025. doi:10.1094/PDIS-09-19-1929-RE
179. Sedighian N, Krijger M, Taparia T, Taghavi SM, Wicker E, Van Der Wolf JM, et al. Genome resource of two potato strains of *Ralstonia solanacearum* biovar 2 (phylotype IIB sequevar 1) and biovar 2T (phylotype IIB sequevar 25) Isolated from lowlands in Iran. *Mol Plant Microbe Interact*. 2020;33: 872–875. Available: <https://apsjournals.apsnet.org/doi/abs/10.1094/MPMI-02-20-0026-A>
180. Vasconez IN, Besoain X, Vega-Celedón P, Valenzuela M, Seeger M. First report of bacterial wilt caused by *Ralstonia solanacearum* phylotype IIB sequevar 1 affecting tomato in different regions of Chile. *Plant Dis*. 2020;104: 2023. doi:10.1094/pdis-01-20-0181-pdn
181. Alvarez Romero PII, Grabowski Ocampos CJ, Carpio Coba CF, Toro Álvarez SV, Ferreira AT, Mizubuti ESG. First report of *Ralstonia solanacearum* causing bacterial wilt of eucalyptus in Ecuador. *Plant Dis*. 2020. doi:10.1094/PDIS-11-19-2516-PDN
182. Bihon W, Chen J-R, Kenyon L. Identification and characterization of *Ralstonia* spp. causing bacterial wilt disease of vegetables in Mali. *J Plant Pathol*. 2020;102: 1029–1039. doi:10.1007/s42161-020-00631-1
183. He Y, Mo Y, Zheng D, Li Q, Lin W, Yuan G. Different Sequevars of *Ralstonia pseudosolanacearum* Causing Bacterial Wilt of *Bidens pilosa* in China. *Plant Dis*. 2020;104: 2768–2773. doi:10.1094/PDIS-12-19-2738-SC
184. Horita M, Sakai YK. Specific detection and quantification of *Ralstonia pseudosolanacearum* race 4 strains from Zingiberaceae plant cultivation soil by MPN-PCR. *J Gen Plant Pathol*. 2020;86: 393–400. doi:10.1007/s10327-020-00939-x
185. Kunwar S, Bamazi B, Banito A, Carter M, Weinstein S, Steidl OR, et al. First report of bacterial wilt disease of tomato, pepper and gboma caused by the *Ralstonia solanacearum* species complex in Togo. *Plant Disease*. 2020. doi:10.1094/PDIS-08-20-1665-PDN
186. Mollae A, Hosseinipour A, Azadvar M, Massumi H, Ebrahimi F. Phylotype and sequevar determination and AFLP fingerprinting of *Ralstonia solanacearum* strains causing bacterial wilt of potato in southeastern Iran. *Eur J Plant Pathol*. 2020;157: 389–402. doi:10.1007/s10658-020-02018-5
187. Patil VU, Vanishree G, Sagar V, Chakrabarti SK. Microsatellites composition in bipartite *Ralstonia solanacearum* genomes: A comparative study between the phylotypes. *Indian Phytopathology*. 2020;73: 767–770. doi:10.1007/s42360-020-00269-0
188. Sedighian N, Taghavi SM, Hamzehzarghani H, van der Wolf JM, Wicker E, Osdaghi E. Potato-Infecting *Ralstonia solanacearum* Strains in Iran Expand Knowledge on the Global Diversity of



- Brown Rot Ecotype of the Pathogen. *Phytopathology*. 2020;110: 1647–1656. doi:10.1094/PHYTO-03-20-0072-R
189. Albuquerque GR, Lucena LP, Assunção EF, Mesquita JCP, Silva AMF, Souza EB, et al. Evaluation of tomato rootstocks to *Ralstonia solanacearum* and *R. pseudosolanacearum* in Mata mesoregion, PE. *Hortic Bras*. 2021;39: 72–78. doi:10.1590/s0102-0536-20210111
190. He Y, Chen Y, Zhang Y, Qin X, Wei X, Zheng D, et al. Genetic diversity of *Ralstonia solanacearum* species complex strains obtained from Guangxi, China and their pathogenicity on plants in the Cucurbitaceae family and other botanical families. *Plant Pathol*. 2021. doi:10.1111/ppa.13389
191. Siregar BA, Giyanto G, Hidayat SH, Siregar IZ, Tjahjono B. Diversity of *Ralstonia pseudosolanacearum*, the causal agent of bacterial wilt on *Eucalyptus pellita* in Indonesia. *Biodiversitas*. 2021;22. doi:10.13057/biodiv/d220664
192. Li C, Ju Y, Shen P, Wu X, Cao L, Zhou B, et al. Development of Recombinase Polymerase Amplification Combined with Lateral Flow Detection Assay for Rapid and Visual Detection of *Ralstonia solanacearum* in Tobacco. *Plant Dis*. 2021;105: 3985–3989. doi:10.1094/PDIS-04-21-0688-RE
193. Pais AKL, Silva JR da, Santos LVSD, Albuquerque GMR, Farias ARG de, Silva Junior WJ, et al. Genomic sequencing of different sequevars of *Ralstonia solanacearum* belonging to the Moko ecotype. *Genet Mol Biol*. 2021;44: e20200172. doi:10.1590/1678-4685-GMB-2020-0172
194. Bereika MFF, Moharam MHA, Abo-Elyousr KAM, Asran MR. Investigation of virulence diversity in *Ralstonia solanacearum* isolates by a random amplified polymorphic DNA collected from Egyptian potato fields. *Archives of Phytopathology and Plant Protection*. 2022;55: 1201–1218. doi:10.1080/03235408.2022.2081770
195. Beutler J, Holden S, Georgoulis SJ, Williams D, Norman D, Lowe-Power T. Whole genome sequencing suggests that “non-pathogenicity on banana (NPB)” is the ancestral state of the *Ralstonia solanacearum* IIB-4 lineage. *PhytoFrontiers™*. 2022. doi:10.1094/PHYTOFR-06-22-0068-SC
196. Bocsanczy AM, Bonants P, van der Wolf J, Bergsma-Vlami M, Norman DJ. Identification of candidate type 3 effectors that determine host specificity associated with emerging *Ralstonia pseudosolanacearum* strains. *Eur J Plant Pathol*. 2022;163: 35–50. doi:10.1007/s10658-021-02455-w
197. Hossain MM, Masud MM, Hossain MI, Haque MM, Uddin MS, Alam MZ, et al. Rep-PCR Analyses Reveal Genetic Variation of *Ralstonia solanacearum* Causing Wilt of Solanaceous Vegetables in Bangladesh. *Curr Microbiol*. 2022;79: 234. doi:10.1007/s00284-022-02932-3
198. Tan X, Dai X, Chen T, Wu Y, Yang D, Zheng Y, et al. Complete Genome Sequence Analysis of *Ralstonia solanacearum* Strain PeaFJ1 Provides Insights Into Its Strong Virulence in Peanut Plants. *Front Microbiol*. 2022;13: 830900. doi:10.3389/fmicb.2022.830900
199. Price MN, Dehal PS, Arkin AP. FastTree 2--approximately maximum-likelihood trees for large alignments. *PLoS One*. 2010;5: e9490. doi:10.1371/journal.pone.0009490
200. Ailloud F, Lowe T, Cellier G, Roche D, Allen C, Prior P. Comparative genomic analysis of *Ralstonia solanacearum* reveals candidate genes for host specificity. *BMC Genomics*. 2015;16: 270. doi:10.1186/s12864-015-1474-8

201. Letunic I, Bork P. Interactive Tree Of Life (iTOL) v5: an online tool for phylogenetic tree display and annotation. *Nucleic Acids Res.* 2021;49: W293–W296. doi:10.1093/nar/gkab301
